# Supplementary material
Source: PubMed Central journal article supplement (PMC2711499)
Supplement: mmc1.pdf [file mmc1.pdf]

Biophysical Journal, Volume 96

**Supporting Material**

**An Integrated Model of Eicosanoid Metabolism and Signaling Based on Lipidomics Flux Analysis**

Shakti Gupta, Mano Ram Maurya, Daren L. Stephens, Edward A. Dennis, and Shankar Subramaniam

## Supporting material

to

### **An Integrated Model of Eicosanoid Metabolism and Signaling Based on Lipidomics Flux Analysis**

Shakti Gupta\*, Mano Ram Maurya\*, Daren L. Stephens<sup>#</sup>, Edward A. Dennis<sup>#</sup>, and Shankar Subramaniam<sup>\*,#,§,1</sup>,

\*Department of Bioengineering

<sup>#</sup>Department of Chemistry & Biochemistry and Department of Pharmacology, School of Medicine

<sup>§</sup>Graduate Program in Bioinformatics

University of California, San Diego, 9500 Gilman Dr., La Jolla CA 92093

E-mail: [shakti@sdsc.edu](mailto:shakti@sdsc.edu), [mano@sdsc.edu](mailto:mano@sdsc.edu), [darenl@bellsouth.net](mailto:darenl@bellsouth.net), [edennis@ucsd.edu](mailto:edennis@ucsd.edu), [shankar@ucsd.edu](mailto:shankar@ucsd.edu)

---

<sup>1</sup> Corresponding author, SS, Tel.: 858-822-0986; Fax: 858-822-5722; email: shankar@ucsd.edu

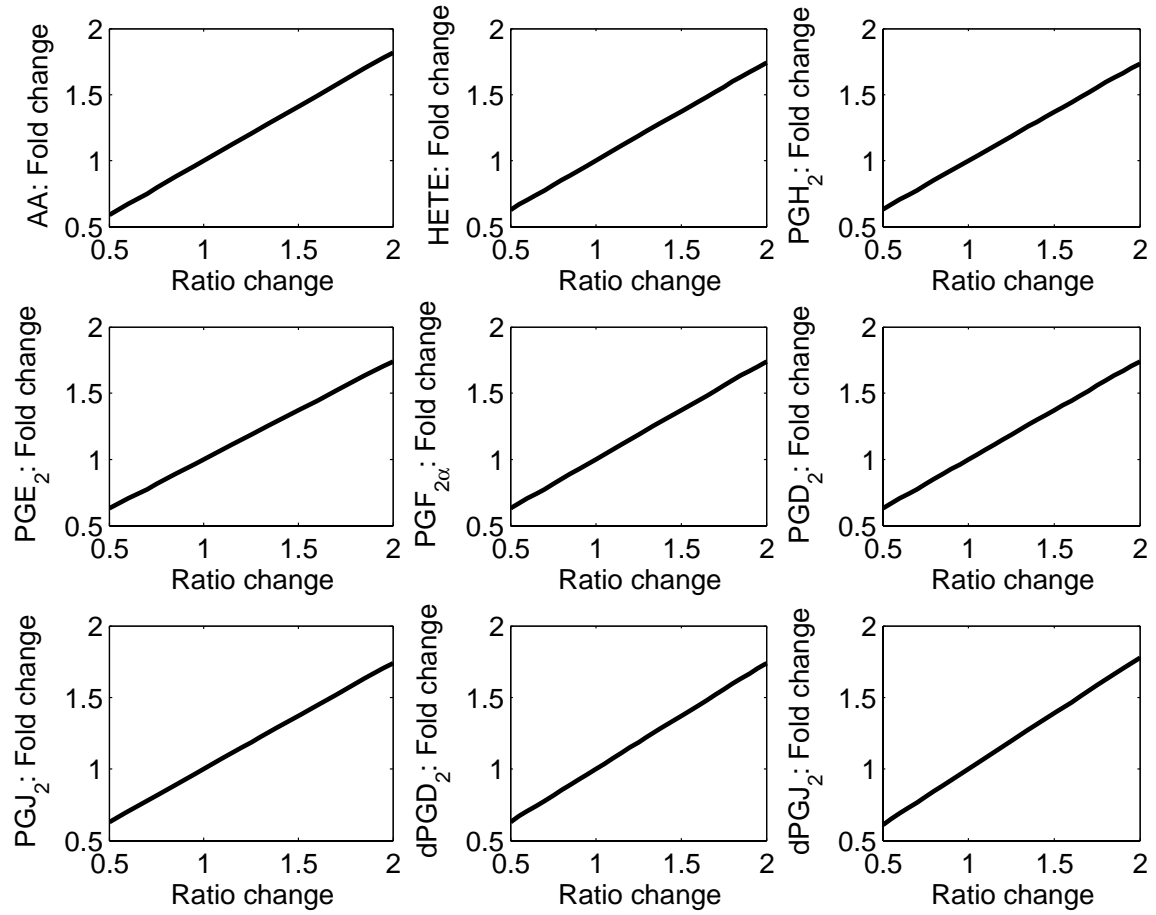

Figure S1. Result of parametric sensitivity analysis for the parameter  $k_1$  ([LPS] FA  $\rightarrow$  AA). X-axis: ratio of perturbed value of the parameter to the original (optimized) value of the parameter; Y-axis: fold-change in the maximum-value of state variables (metabolites).

Table S1. Results of parametric sensitivity analysis\*. The sensitivity was calculated as the slope of the sensitivity curves (e.g. Fig. S1) at the optimized value of the parameters.

|                       | <b>AA</b> | <b>HETE</b> | <b>PGH<sub>2</sub></b> | <b>PGE<sub>2</sub></b> | <b>PGF<sub>2α</sub></b> | <b>PGD<sub>2</sub></b> | <b>PGJ<sub>2</sub></b> | <b>dPGD<sub>2</sub></b> | <b>dPGJ<sub>2</sub></b> |
|-----------------------|-----------|-------------|------------------------|------------------------|-------------------------|------------------------|------------------------|-------------------------|-------------------------|
| <b>K<sub>1</sub></b>  | 0.82      | 0.75        | 0.74                   | 0.74                   | 0.74                    | 0.75                   | 0.74                   | 0.74                    | 0.78                    |
| <b>K<sub>2</sub></b>  | 0.00      | 0.00        | 0.00                   | 0.00                   | 0.00                    | 0.00                   | 0.00                   | 0.00                    | 0.00                    |
| <b>K<sub>3</sub></b>  | 0.00      | 0.00        | 0.00                   | 0.00                   | 0.00                    | 0.00                   | 0.00                   | 0.00                    | 0.00                    |
| <b>K<sub>4</sub></b>  | 0.00      | 0.00        | 0.00                   | 0.00                   | 0.00                    | 0.00                   | 0.00                   | 0.00                    | 0.00                    |
| <b>k<sub>5</sub></b>  | 0.00      | 0.00        | 0.00                   | 0.00                   | 0.00                    | 0.00                   | 0.00                   | 0.00                    | 0.00                    |
| <b>k<sub>6</sub></b>  | 0.22      | 0.19        | 0.20                   | 0.19                   | 0.19                    | 0.19                   | 0.19                   | 0.19                    | 0.20                    |
| <b>k<sub>7</sub></b>  | 0.00      | 0.00        | 0.00                   | 0.00                   | 0.00                    | 0.00                   | 0.00                   | 0.00                    | 0.00                    |
| <b>k<sub>8</sub></b>  | -0.01     | 0.98        | 0.00                   | -0.04                  | -0.04                   | -0.03                  | -0.04                  | -0.04                   | -0.03                   |
| <b>k<sub>9</sub></b>  | 0.00      | -0.55       | 0.00                   | 0.00                   | 0.00                    | 0.00                   | 0.00                   | 0.00                    | 0.00                    |
| <b>k<sub>10</sub></b> | -0.04     | -0.11       | 0.21                   | 0.04                   | 0.04                    | 0.11                   | 0.06                   | 0.07                    | 0.10                    |
| <b>k<sub>11</sub></b> | -0.05     | -0.04       | 0.15                   | 0.01                   | 0.01                    | 0.00                   | 0.01                   | 0.01                    | 0.02                    |
| <b>k<sub>12</sub></b> | -0.11     | -0.32       | 0.52                   | 0.10                   | 0.10                    | 0.30                   | 0.16                   | 0.18                    | 0.26                    |
| <b>k<sub>13</sub></b> | 0.00      | 0.00        | -0.05                  | 0.94                   | -0.06                   | -0.06                  | -0.06                  | -0.06                   | -0.06                   |
| <b>k<sub>14</sub></b> | 0.00      | 0.00        | 0.00                   | 0.00                   | 0.00                    | 0.00                   | 0.00                   | 0.00                    | 0.00                    |
| <b>k<sub>15</sub></b> | 0.00      | 0.00        | -0.02                  | -0.02                  | 0.98                    | -0.02                  | -0.02                  | -0.02                   | -0.02                   |
| <b>k<sub>16</sub></b> | 0.00      | 0.00        | 0.00                   | 0.00                   | 0.00                    | 0.00                   | 0.00                   | 0.00                    | 0.00                    |
| <b>k<sub>17</sub></b> | 0.01      | 0.01        | -0.83                  | -0.92                  | -0.92                   | 0.09                   | 0.09                   | 0.09                    | 0.11                    |
| <b>k<sub>18</sub></b> | 0.00      | 0.00        | 0.00                   | 0.00                   | 0.00                    | -0.28                  | 0.60                   | -0.38                   | 0.72                    |
| <b>k<sub>19</sub></b> | 0.00      | 0.00        | 0.00                   | 0.00                   | 0.00                    | -0.15                  | -0.21                  | 0.80                    | -0.18                   |
| <b>k<sub>20</sub></b> | 0.00      | 0.00        | 0.00                   | 0.00                   | 0.00                    | 0.00                   | 0.00                   | -0.15                   | 0.00                    |
| <b>k<sub>21</sub></b> | 0.00      | 0.00        | 0.00                   | 0.00                   | 0.00                    | 0.00                   | -0.34                  | 0.00                    | 0.78                    |
| <b>k<sub>22</sub></b> | 0.00      | 0.00        | 0.00                   | 0.00                   | 0.00                    | 0.00                   | 0.00                   | 0.00                    | -0.64                   |

\* Unit of parameter sensitivity is fold change in peak-height of metabolites / ratio change in parameter value.
